# Supplementary material for: Crystal structure and biochemical analyses reveal Beclin 1 as a novel membrane binding protein
Source: PubMed Central journal article supplement — Cell Res. 2012 Feb 7;22(3):473–89. doi: 10.1038/cr.2012.24 (PMC3292424; doi:10.1038/cr.2012.24), 2012-02-07
Supplement: cr201224x1.pdf [file cr201224x1.pdf]

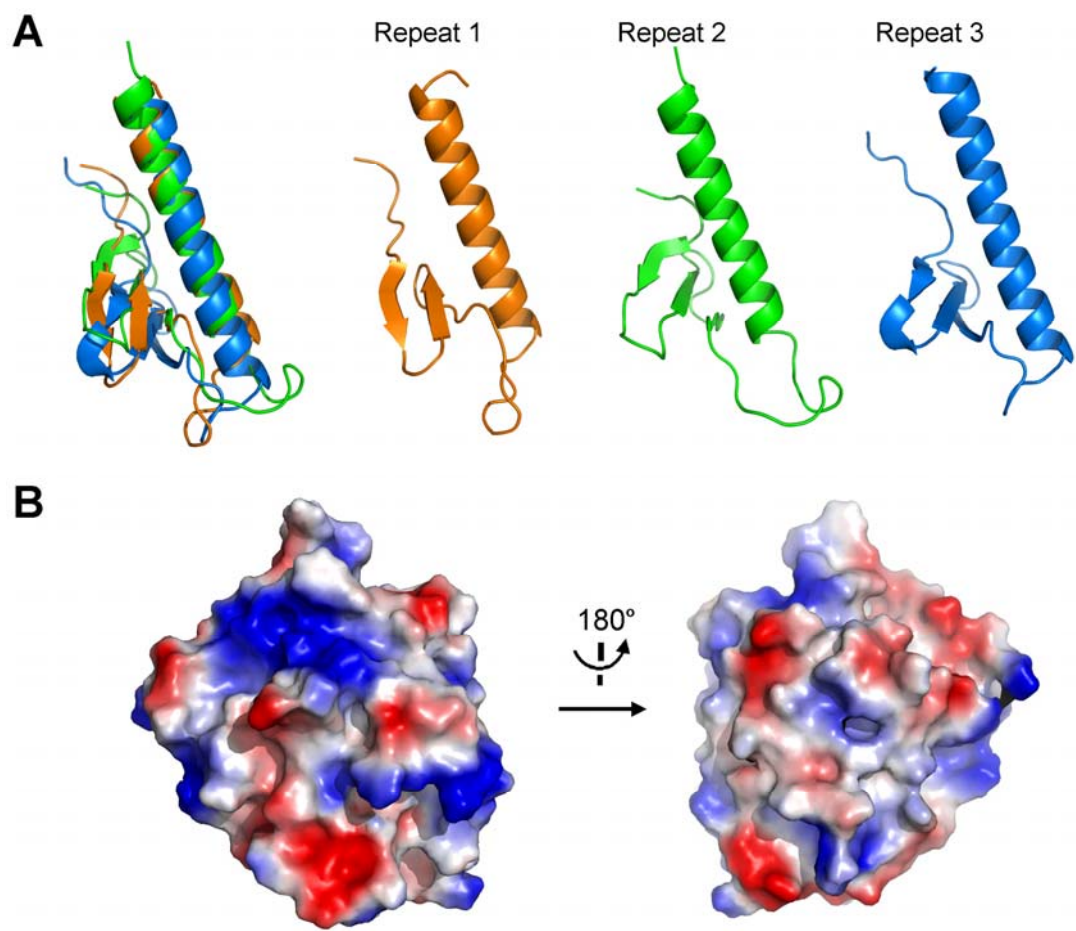

**Figure S1** Structural features of Beclin 1 ECD. **(A)** Beclin 1 ECD comprises three structural repeats. Repeats 1, 2, and 3 contain amino acids 269-323, 324-380, and 387-444, respectively. These three repeats can be superimposed with each other with a pair-wise, root-mean-squared deviation (RMSD) of 2.3 Å, 1.4 Å, and 3.1 Å, respectively, over 46, 53, and 50 aligned C $\alpha$  atoms between repeats 1 and 2, 2 and 3, and 1 and 3. **(B)** The surface electrostatic potential of Beclin 1 ECD is shown. The red and blue colors denote negatively and positively charged surface potential, respectively.
