# Supplementary material for: Crystal structure and biochemical analyses reveal Beclin 1 as a novel membrane binding protein
Source: PubMed Central journal article supplement — Cell Res. 2012 Feb 7;22(3):473–89. doi: 10.1038/cr.2012.24 (PMC3292424; doi:10.1038/cr.2012.24), 2012-02-07
Supplement: cr201224x3.pdf [file cr201224x3.pdf]

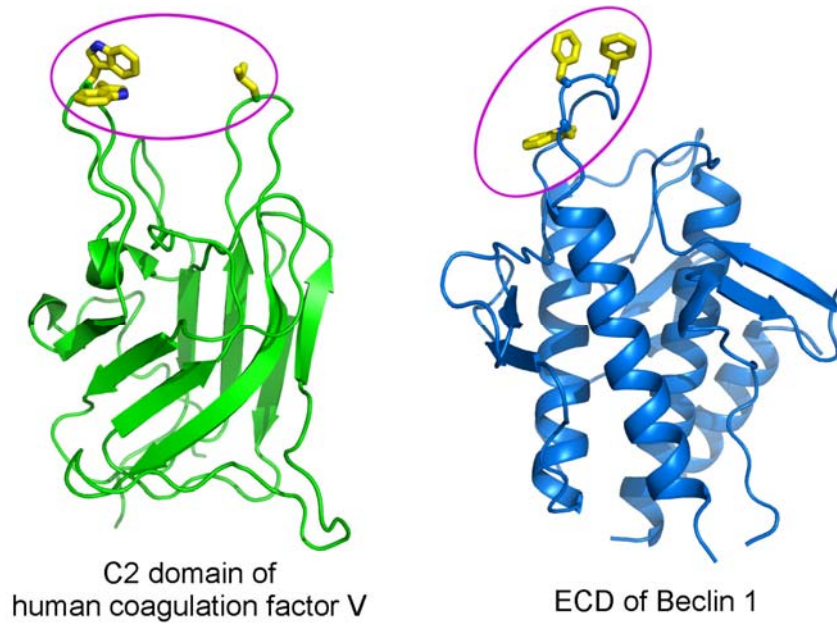

**Figure S3** Structural comparison of Beclin 1 ECD with the C2 domain of human coagulation factor V. Membrane insertion by the C2 domain (PDB code 1CZS) is thought to be accomplished by aromatic and hydrophobic residues Trp26, Trp27, and Lue79, all located at the tip of surface loops [1]. By analogy, membrane insertion by Beclin 1 ECD is likely mediated by the aromatic residues Phe359, Phe360, and Trp361.

## References

1. Macedo-Ribeiro S, Bode W, Huber R, *et al.* Crystal structures of the membrane-binding C2 domain of human coagulation factor V. *Nature* 1999; **402**: 434-439.
2. Borisenko GG, Iverson SL, Ahlberg S, Kagan VE, Fadeel B. Milk fat globule epidermal growth factor 8 (MFG-E8) binds to oxidized phosphatidylserine: implications for macrophage clearance of apoptotic cells. *Cell Death Differ* 2004; **11**: 943-945.
3. Nakatani H, Aoki N, Nakagawa Y, *et al.* Weaning-induced expression of a milk-fat globule protein, MFG-E8, in mouse mammary glands, as demonstrated by the analyses of its mRNA, protein and phosphatidylserine-binding activity. *Biochem J* 2006; **395**: 21-30.
