# Supplementary material for: Crystal structure and biochemical analyses reveal Beclin 1 as a novel membrane binding protein
Source: PubMed Central journal article supplement — Cell Res. 2012 Feb 7;22(3):473–89. doi: 10.1038/cr.2012.24 (PMC3292424; doi:10.1038/cr.2012.24), 2012-02-07
Supplement: cr201224x5.pdf [file cr201224x5.pdf]

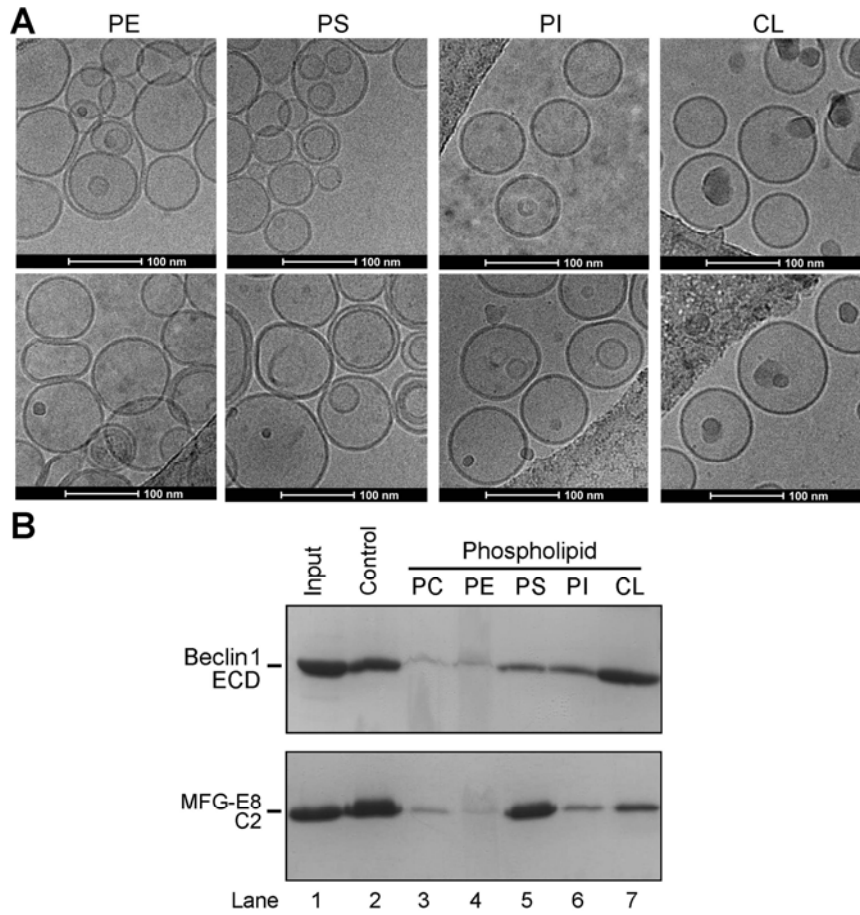

**Figure S5** Validation of the membrane binding experiments by Beclin 1 ECD. **(A)** The liposomes used in our binding experiments exhibit normal appearance as judged by electron microscopic analysis. Shown here are liposomes containing 50 percent PC and 50 percent specific phospholipid as indicated. Liposomes of other composition are similarly well formed. **(B)** The C2 domain of a milk-fat globule protein MFG-E8 exhibits a strong preference towards PS-enriched liposomes. The C2 domain of MFG-E8 (residues 306-426), expressed and purified to homogeneity, was examined for binding to liposomes with variable components. In contrast to Beclin 1 ECD, strong preference was observed for PS-enriched liposomes. This result is fully consistent with previous reports [2, 3] and validates our liposome binding assays.

## References

1. Macedo-Ribeiro S, Bode W, Huber R, *et al.* Crystal structures of the membrane-binding C2 domain of human coagulation factor V. *Nature* 1999; **402**: 434-439.
2. Borisenko GG, Iverson SL, Ahlberg S, Kagan VE, Fadeel B. Milk fat globule epidermal growth factor 8 (MFG-E8) binds to oxidized phosphatidylserine: implications for macrophage clearance of apoptotic cells. *Cell Death Differ* 2004; **11**: 943-945.
3. Nakatani H, Aoki N, Nakagawa Y, *et al.* Weaning-induced expression of a milk-fat globule protein, MFG-E8, in mouse mammary glands, as demonstrated by the analyses of its mRNA, protein and phosphatidylserine-binding activity. *Biochem J* 2006; **395**: 21-30.
