# Supplementary material for: Crystal structure and biochemical analyses reveal Beclin 1 as a novel membrane binding protein
Source: PubMed Central journal article supplement — Cell Res. 2012 Feb 7;22(3):473–89. doi: 10.1038/cr.2012.24 (PMC3292424; doi:10.1038/cr.2012.24), 2012-02-07
Supplement: cr201224x6.pdf [file cr201224x6.pdf]

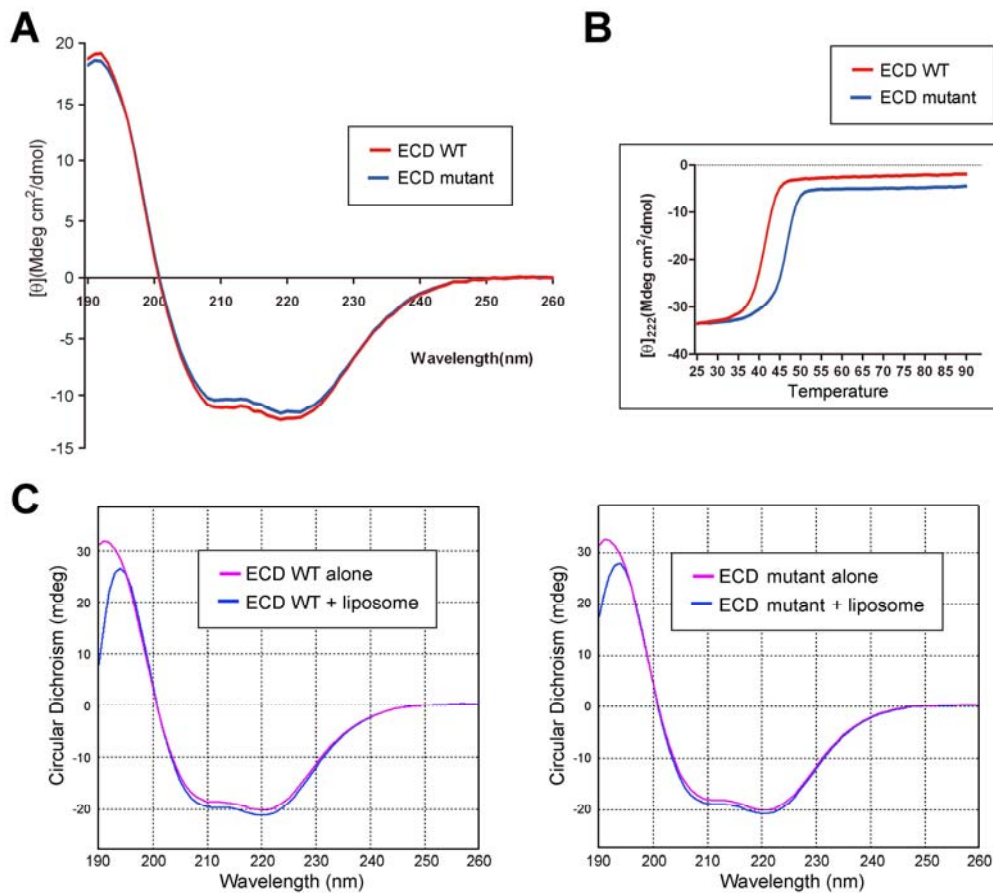

**Figure S6** Mutation of the aromatic finger does not compromise the structure or stability of the Beclin 1 ECD. **(A)** The secondary structural elements are nearly identical between the WT and mutant Beclin 1 ECD. Shown here are circular dichroism spectra for the WT and mutant (F359D/F360D/W361D) Beclin 1 ECD. **(B)** The melting temperature of the mutant Beclin 1 ECD is 5 degrees higher than that of the WT Beclin 1 ECD. This result reflects increased thermal stability for the mutant Beclin 1 ECD, which is likely caused by the replacement of hydrophobic amino acids (Phe and Trp) by hydrophilic ones (Asp). **(C)** The secondary structural elements are nearly identical in the absence or presence of 0.6 mg/ml liposomes, for both the WT (left panel) and mutant (right panel) Beclin 1 ECD.
