# Supplementary material for: Crystal structure and biochemical analyses reveal Beclin 1 as a novel membrane binding protein
Source: PubMed Central journal article supplement — Cell Res. 2012 Feb 7;22(3):473–89. doi: 10.1038/cr.2012.24 (PMC3292424; doi:10.1038/cr.2012.24), 2012-02-07
Supplement: cr201224x9.pdf [file cr201224x9.pdf]

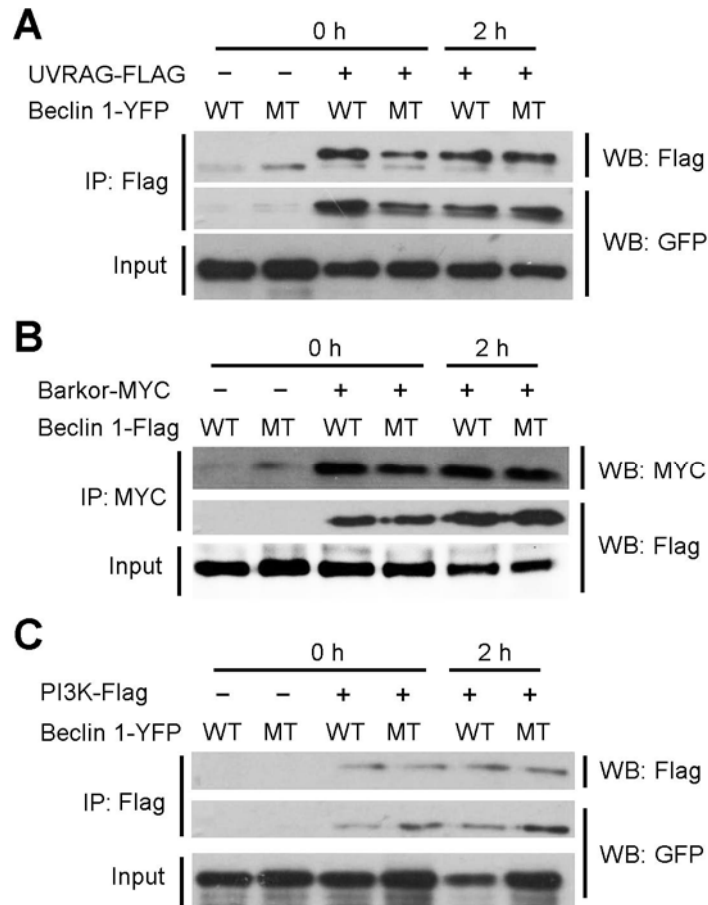

**Figure S9** Mutation of the aromatic finger does not affect interactions between Beclin 1 and UVRAG, Barkor, or PI3KC3. **(A)** The interactions between Beclin 1 and UVRAG were unaffected by mutation of the aromatic finger (F359D/F360D/W361D). Beclin 1-YFP and Flag-UVRAG were co-transfected into 293T cells. UVRAG was immune-precipitated by an anti-Flag antibody; the pellet was subjected to Western blot analysis using anti-Flag or anti-GFP antibodies. WT: wild-type; MT: mutant. **(B)** The interactions between Beclin 1 and Barkor were unaffected by mutation of the aromatic finger. Experiments in panels **B** and **C** were performed similarly as in panel **A**. **(C)** The interactions between Beclin 1 and PI3KC3 were unaffected by mutation of the aromatic finger.
