# Supplementary material for: Crystal structure and biochemical analyses reveal Beclin 1 as a novel membrane binding protein
Source: PubMed Central journal article supplement — Cell Res. 2012 Feb 7;22(3):473–89. doi: 10.1038/cr.2012.24 (PMC3292424; doi:10.1038/cr.2012.24), 2012-02-07
Supplement: cr201224x10.pdf [file cr201224x10.pdf]

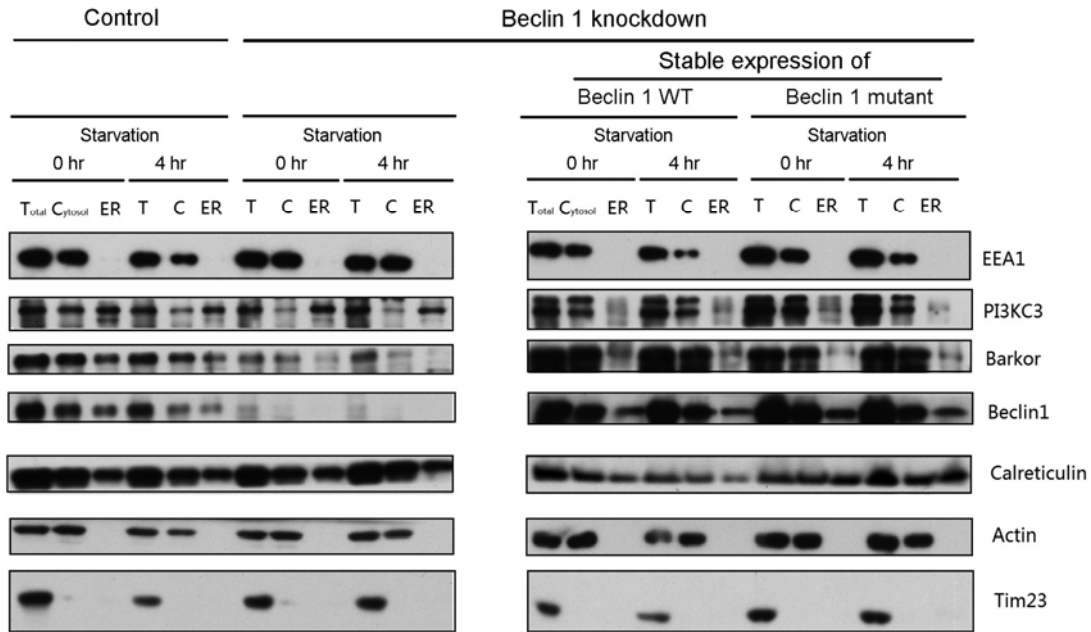

**Figure S10** Mutation of the aromatic finger does not alter targeting of Barkor or PI3KC3 to endoplasmic reticulum (ER). Shown here are results of Western blots for normal HeLa cells (Control), Beclin 1 knockdown HeLa cells, and Beclin 1 knockdown cells with stable expression of either WT or mutant (F359D/F360D/W361D) Beclin 1. Following starvation, total cells (T) were fractionated into ER fraction (ER) and clear cytosolic fraction (C). The presence of Barkor and PI3KC3 was examined by Western blots. The marker proteins were TIM23 (for mitochondria), actin (cytosol), calreticulin (ER), and EEA1 (early endosomes).
