# Supplementary material for: Crystal structure and biochemical analyses reveal Beclin 1 as a novel membrane binding protein
Source: PubMed Central journal article supplement — Cell Res. 2012 Feb 7;22(3):473–89. doi: 10.1038/cr.2012.24 (PMC3292424; doi:10.1038/cr.2012.24), 2012-02-07
Supplement: cr201224x11.pdf [file cr201224x11.pdf]

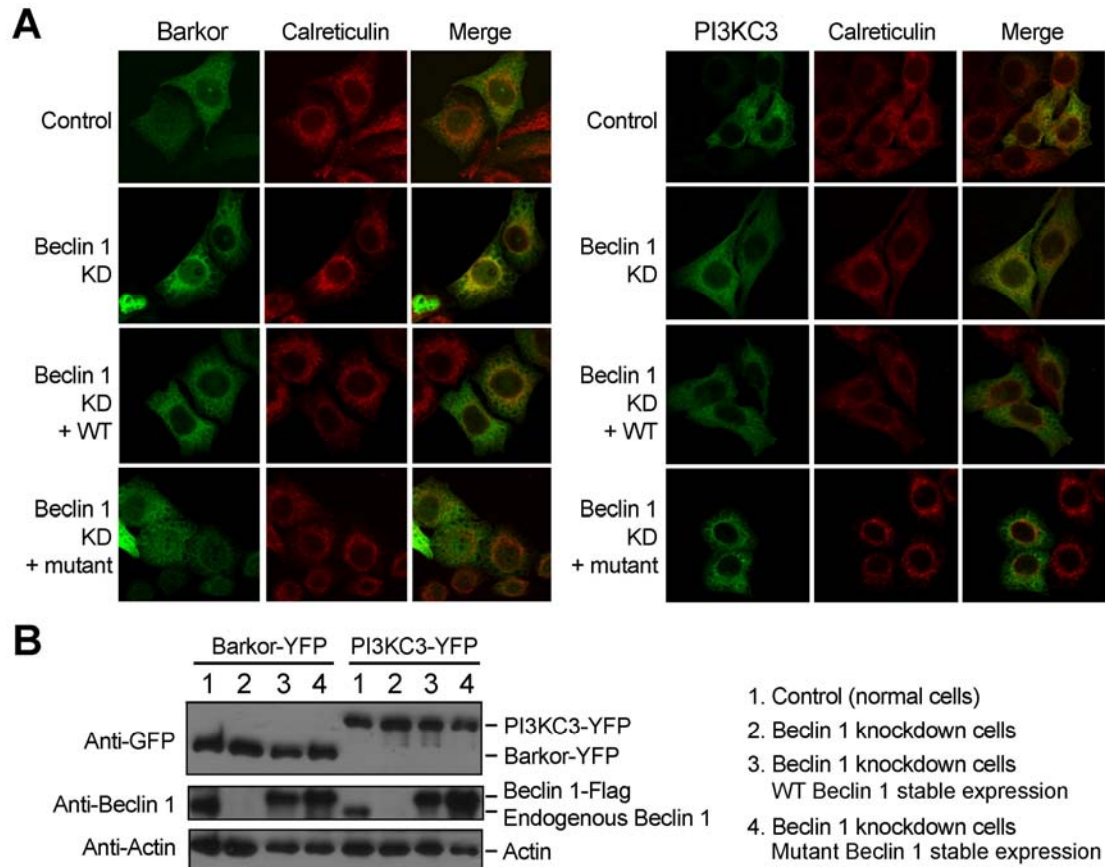

**Figure S11** Mutation of the aromatic finger does not alter targeting of Barkor or PI3KC3 to endoplasmic reticulum (ER). **(A)** Shown here are cellular fluorescence staining patterns for Barkor and PI3KC3. Barkor-YFP, PI3KC3-YFP, and calreticulin were stained in normal HeLa cells (Control), Beclin 1 knockdown HeLa cells (Beclin 1 KD), and Beclin 1 knockdown cells with stable expression of either WT or mutant (F359D/F360D/W361D) Beclin 1. **(B)** The expression levels of Barkor or PI3KC3 are similar in the four different types of HeLa cells. Shown here are Western blot results of Barkor, PI3KC3, Beclin 1, and actin.
