# Supplementary material for: Crystal structure and biochemical analyses reveal Beclin 1 as a novel membrane binding protein
Source: PubMed Central journal article supplement — Cell Res. 2012 Feb 7;22(3):473–89. doi: 10.1038/cr.2012.24 (PMC3292424; doi:10.1038/cr.2012.24), 2012-02-07
Supplement: cr201224x12.pdf [file cr201224x12.pdf]

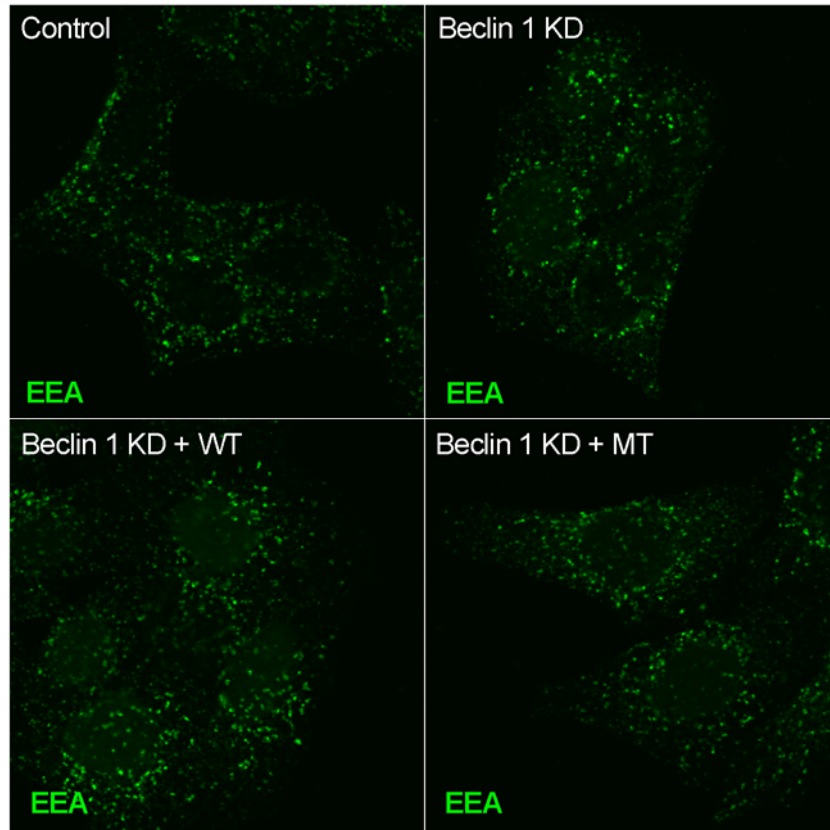

**Figure S12** Mutation of the aromatic finger does not affect the cellular distribution pattern of EEA1. Shown here are staining patterns for endogenous EEA1 in normal HeLa cells (Control), Beclin 1 knockdown HeLa cells (Beclin 1 KD), and Beclin 1 knockdown cells with stable expression of either WT or mutant (MT, F359D/F360D/W361D) Beclin 1.
