# Supplementary material for: Crystal structure and biochemical analyses reveal Beclin 1 as a novel membrane binding protein
Source: PubMed Central journal article supplement — Cell Res. 2012 Feb 7;22(3):473–89. doi: 10.1038/cr.2012.24 (PMC3292424; doi:10.1038/cr.2012.24), 2012-02-07
Supplement: cr201224x13.pdf [file cr201224x13.pdf]

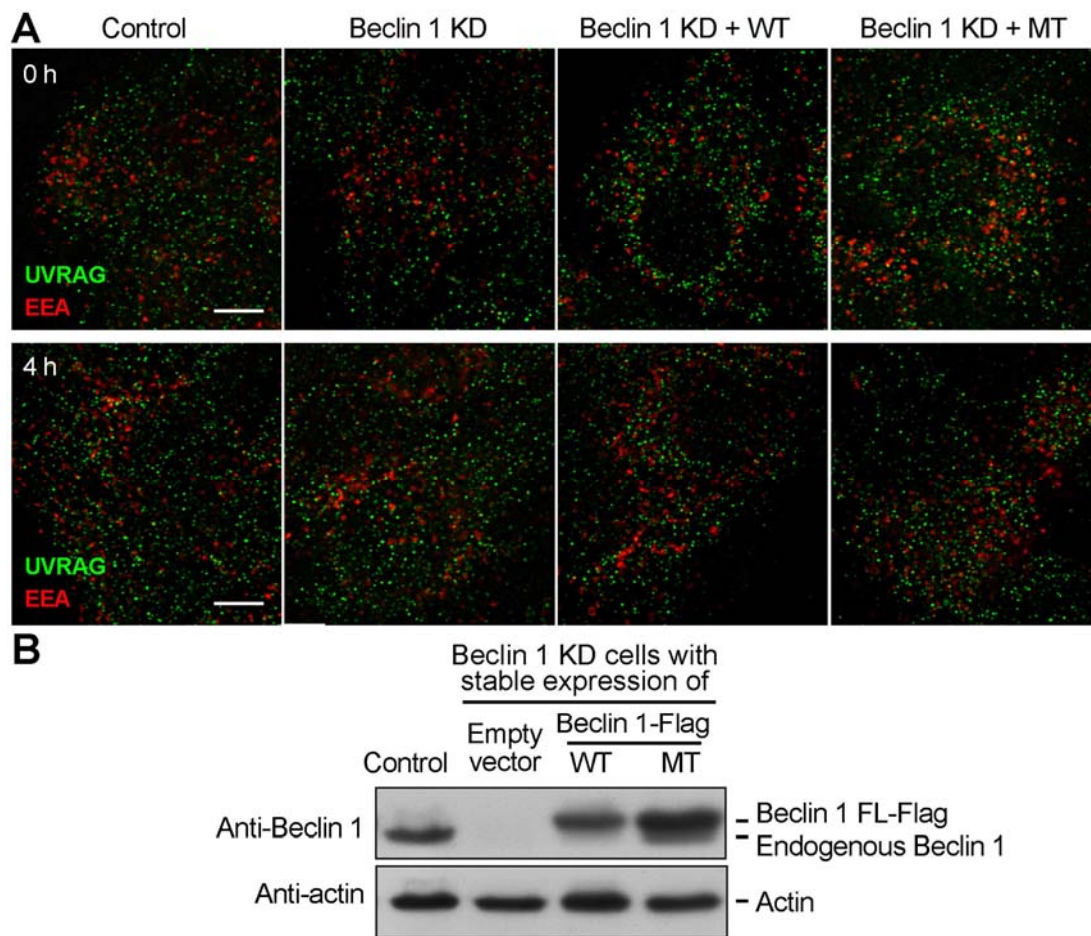

**Figure S13** Mutation of the aromatic finger does not alter cellular localization of UVRAG or EEA1 before or after starvation. **(A)** Shown here are staining patterns for UVRAG (green) and EEA1 (red) in normal HeLa cells (Control), Beclin 1 knockdown HeLa cells (Beclin 1 KD), and Beclin 1 knockdown cells with stable expression of either WT or mutant (MT, F359D/F360D/W361D) Beclin 1. **(B)** Examination of Beclin 1 expression levels in the four different cells by Western blots.
