# Supplementary material for: Crystal structure and biochemical analyses reveal Beclin 1 as a novel membrane binding protein
Source: PubMed Central journal article supplement — Cell Res. 2012 Feb 7;22(3):473–89. doi: 10.1038/cr.2012.24 (PMC3292424; doi:10.1038/cr.2012.24), 2012-02-07
Supplement: cr201224x14.pdf [file cr201224x14.pdf]

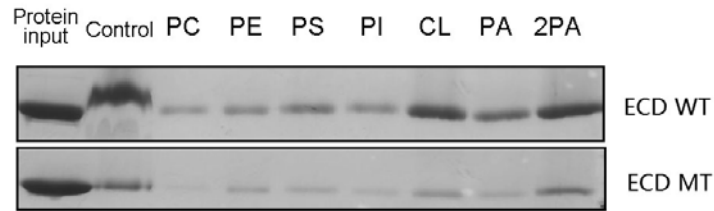

**Figure S14** Characterization of liposome binding by Beclin 1 ECD. The finding that Beclin 1 ECD preferentially associates with cardiolipin-enriched membrane does not necessarily mean that Beclin 1 ECD directly binds cardiolipin. Beclin 1 ECD may simply favor a general physical property of lipid membrane (curvature or charge) that can be supported by cardiolipin. Six different types of liposomes (PC, PE, PS, PI, CL, and PA) were prepared, each containing 90 percent PC (molar percentage) and 10 percent specific phospholipid. The liposomes “2PA” contain 80 percent PC and 20 percent PA. The “Control” liposomes have the same phospholipid composition as the total mitochondrial lipid derived from *Xenopus*. Results of Beclin 1 ECD binding to these liposomes are shown here.
