# Supplementary material for: Crystal structure and biochemical analyses reveal Beclin 1 as a novel membrane binding protein
Source: PubMed Central journal article supplement — Cell Res. 2012 Feb 7;22(3):473–89. doi: 10.1038/cr.2012.24 (PMC3292424; doi:10.1038/cr.2012.24), 2012-02-07
Supplement: cr201224x15.pdf [file cr201224x15.pdf]

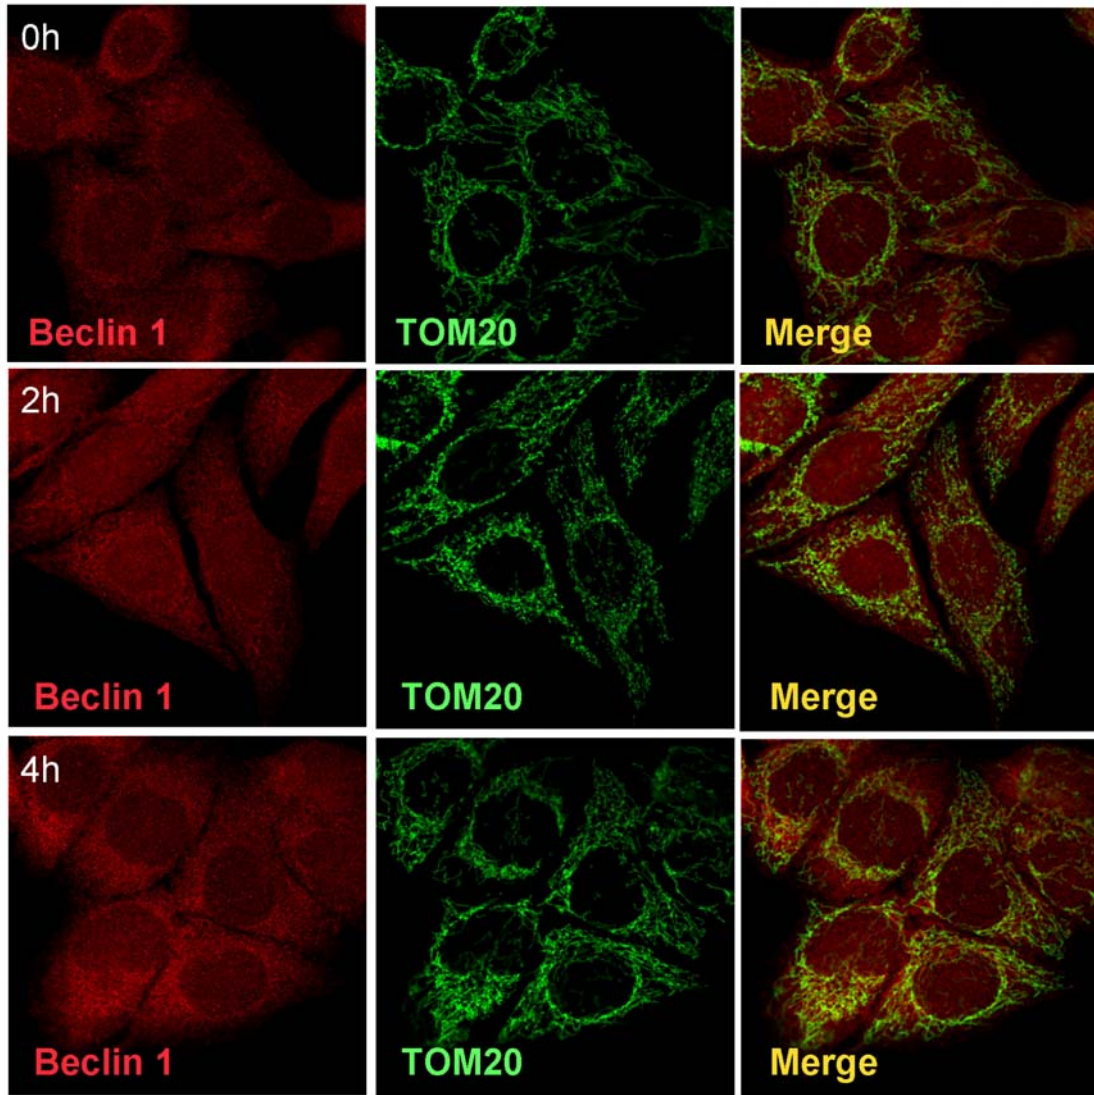

**Figure S15** Cellular localization pattern of endogenous Beclin 1 in NRK cells following starvation. Following starvation, the diffuse staining of Beclin 1 became somewhat punctate. TOM20 is a mitochondrial protein.
