# Supplementary material for: Crystal structure and biochemical analyses reveal Beclin 1 as a novel membrane binding protein
Source: PubMed Central journal article supplement — Cell Res. 2012 Feb 7;22(3):473–89. doi: 10.1038/cr.2012.24 (PMC3292424; doi:10.1038/cr.2012.24), 2012-02-07
Supplement: cr201224x16.pdf [file cr201224x16.pdf]

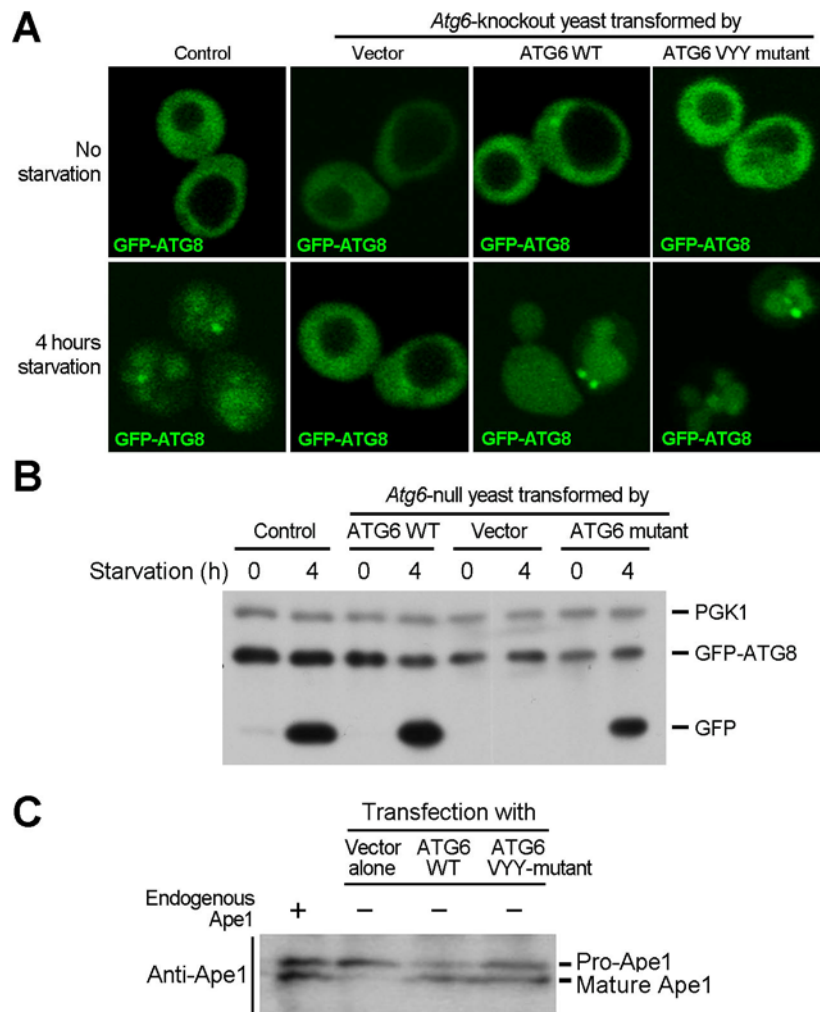

**Figure S16** Mutation of the residues VYY in loop L4 of ATG6 does not appear to cause detectable disruption of autophagy or Cvt pathway in *Saccharomyces cerevisiae*. (A) Mutation of VYY (residues 418-420) to DDD in ATG6 did not affect formation of the autophagosomes as indicated by the localization of GFP-ATG8 (bright green spots). (B) Mutation of VYY in ATG6 did not appear to affect processing of ATG8. (C) Processing of pro-Ape1 in the Cvt pathway was unaffected by the mutation of VYY in ATG6.
